# Supplementary material for: Anticancer and Targeting Activity of Phytopharmaceutical Structural Analogs of a Natural Peptide from Trichoderma longibrachiatum and Related Peptide-Decorated Gold Nanoparticles
Source: MDPI journal article supplement (doi:10.3390/ijms24065537), 2023-03-14
Supplement: s1 [file s1]

## Supporting Information

### **Anticancer Activity of Structural Analogs of a Phytochemical Peptide from *Trichoderma longibrachiatum* and Related Peptide-Decorated Gold Nanoparticles**

Francesca Moret<sup>1</sup>, Luca Menilli<sup>1,#</sup>, Celeste Milani<sup>1,#</sup>, Giorgia Di Cintio<sup>2</sup>, Chiara Dalla Torre<sup>2</sup>, Vincenzo Amendola<sup>2</sup>, Marta De Zotti<sup>2,\*</sup>

<sup>1</sup> Department of Biology, University of Padova, 35131 Padova, Italy;  
francesca.moret@unipd.it; luca.menilli@unipd.it; celeste.milani@studenti.unipd.it

<sup>2</sup> Department of Chemical Sciences, University of Padova, 35131 Padova, Italy;  
giorgia.dicintio@studenti.unipd.it; chiara.dallatorre.2@studenti.unipd.it;  
vincenzo.amendola@unipd.it; marta.dezotti@unipd.it

\* Correspondence to Prof. Marta De Zotti: marta.dezotti@unipd.it

# The authors contributed equally

#### TABLE OF CONTENTS

- 1. Table S1: plant protection properties of trichogin analogs**
- 2. HPLC profiles and HR-ESIMS spectra for the new peptide sequences synthesized in the present work**
- 3. GNP characterizations**
- 4. CD spectra of the new peptide sequences**
- 5. *In vitro* analysis**

## 1. Table S1: plant protection properties of trichogin analogs

| Acronym           | PPP                                                                     |
|-------------------|-------------------------------------------------------------------------|
| TRIC <sup>b</sup> | poor activity against plant pathogens [22]                              |
| Api8-NH2          | new sequence. [21] <sup>b</sup>                                         |
| Leu4-NH2          | not yet studied (new sequence)                                          |
| K2569-Lol         | active against Gram- bacterial plant pathogens [23]                     |
| K259-NH2          | active against Gram- bacterial plant pathogens [23]                     |
| K259-Lol          | active against <i>Pyricularia oryzae</i> [22]                           |
| K25-Lol           | active against <i>B. cinerea</i> [21]                                   |
| K56-Lol           | active against <i>B. cinerea</i> and <i>Plasmopara viticola</i> [21,25] |
| K6-NH2            | active against <i>B. cinerea</i> and <i>P. oryzae</i> [22,24]           |
| K2-NH2            | active against <i>P. oryzae</i> [22]                                    |
| Api8-FITC         | not yet studied (new sequence)                                          |
| Leu4-FITC         | not yet studied (new sequence)                                          |
| Api8-SH           | not yet studied (new sequence)                                          |
| Leu4-SH           | not yet studied (new sequence)                                          |

## 2. HPLC profiles and ESI-MS spectra of the newly synthesized peptides

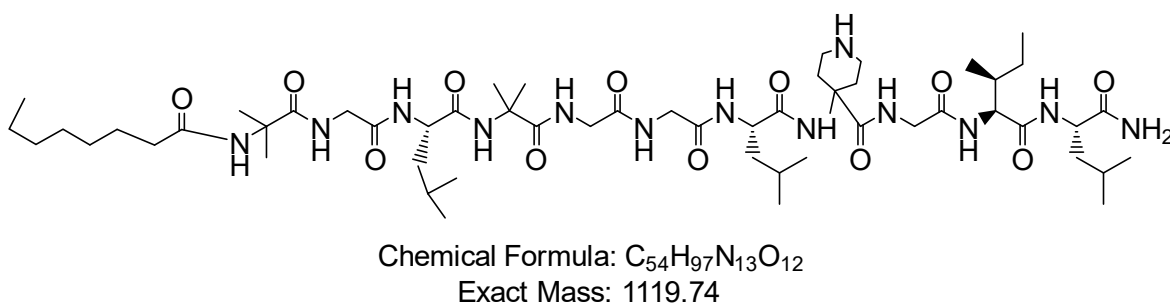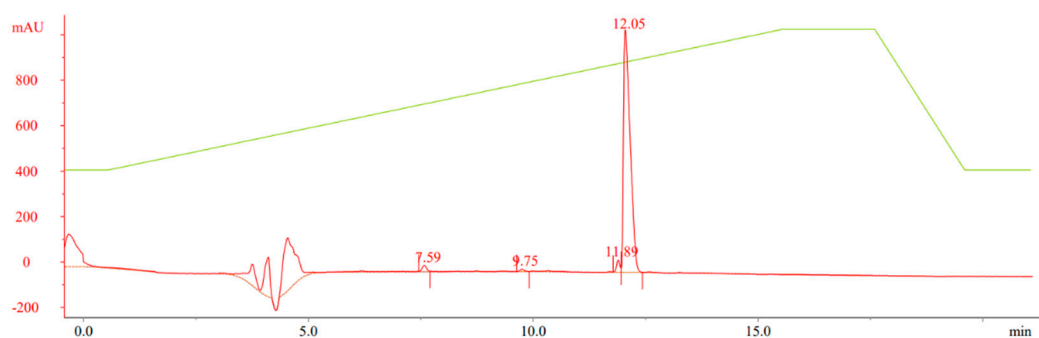

Fig S1. Api8-NH2. Phenomenex C18 column; gradient: 40%-100%B in 15 min, flux 1 mL/min, 216nm. Purity 95%

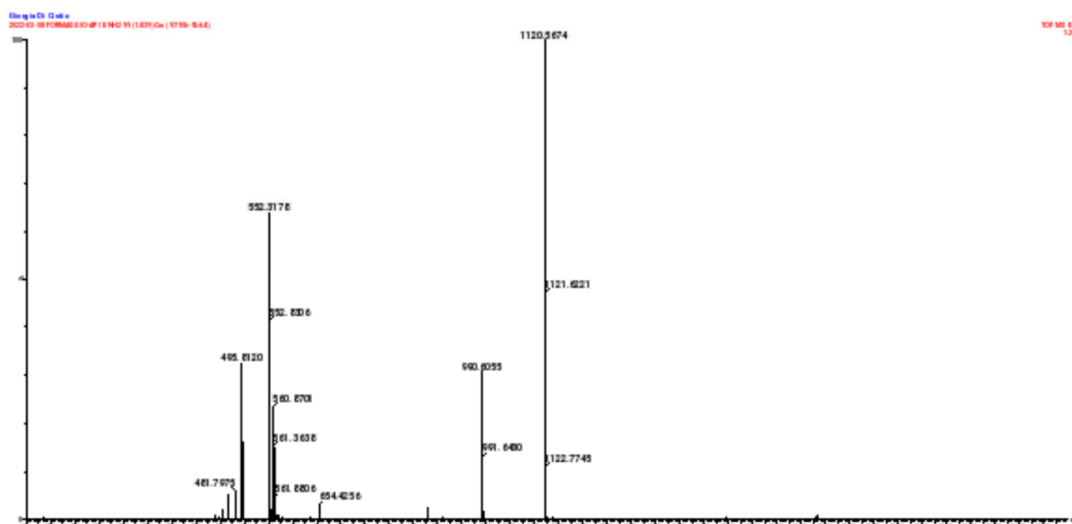

Fig. S2. HR-ESIMS Api8-NH<sub>2</sub>. [MW+H]<sup>+</sup><sub>found</sub> = 1120.5674 g/mol ; [MW+2H]<sup>++</sup><sub>found</sub> = 560.6701 m/z; [MW-Oct+H]<sup>+</sup> = 990.6055 m/z; [MW-Oct+2H]<sup>++</sup> = 495.8120 m/z.

### Api8-FITC

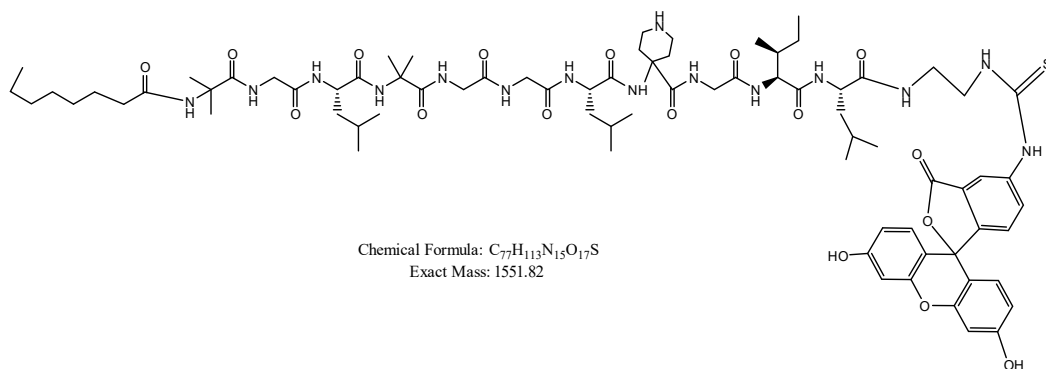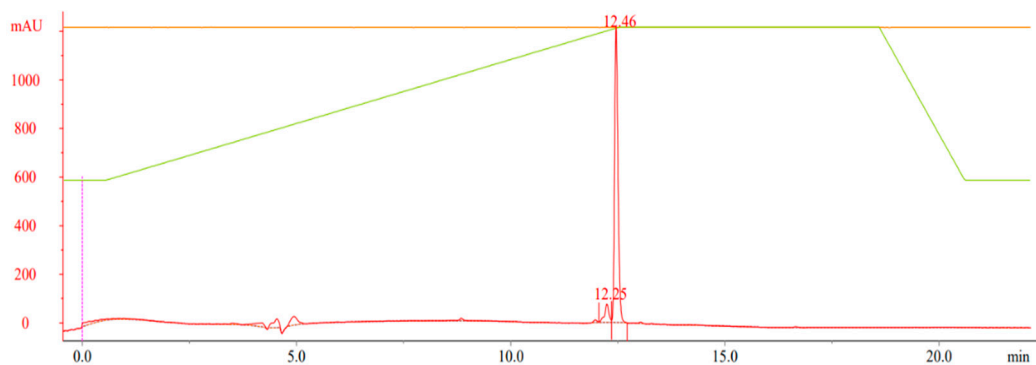

Fig S3. HPLC Chromatogram Api8-FITC. Purity: 95%

ESI-HRMS

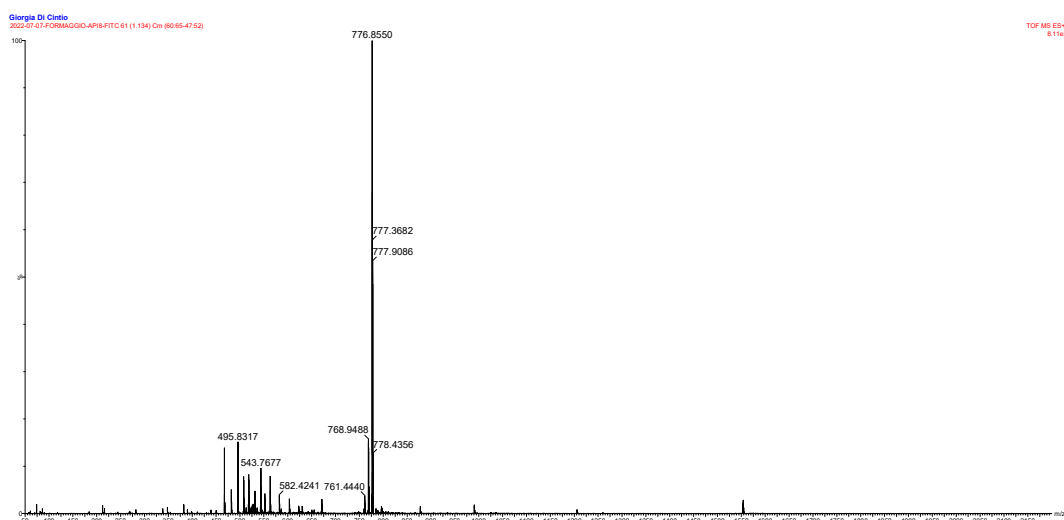

Fig. S4. ESI-HRMS Api8-FITC.  $[MW+H]^+_{\text{found}} = 1552.8671 \text{ m/z}$ ;  $[MW+2H]^{2+}_{\text{found}} = 776.8550 \text{ m/z}$ .

## Api8-SH

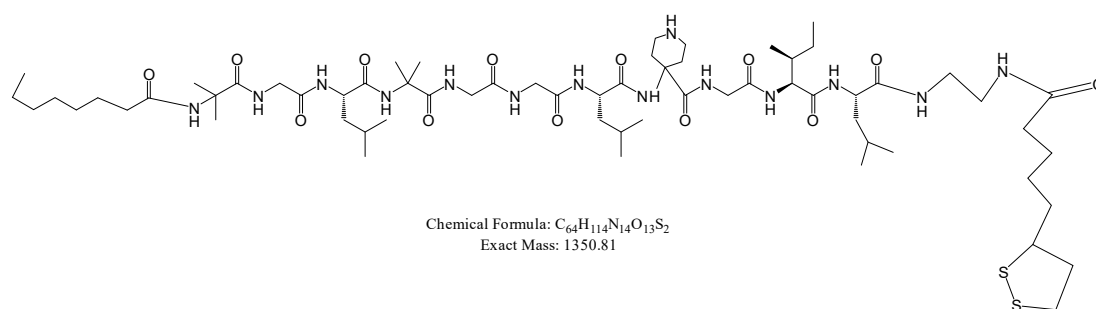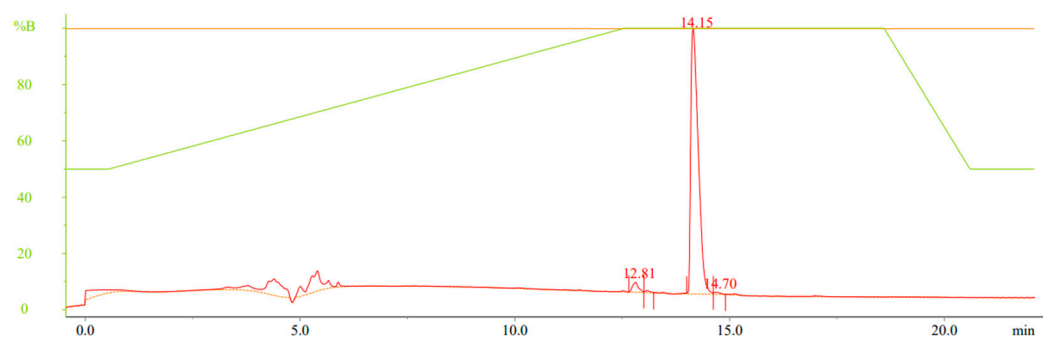

Fig. S5. HPLC chromatogram Api8-SH. Phenomenex C4 40-100%B in 13 min, flux 1 ml/min, wavelength 216 nm. Purity: 96%,

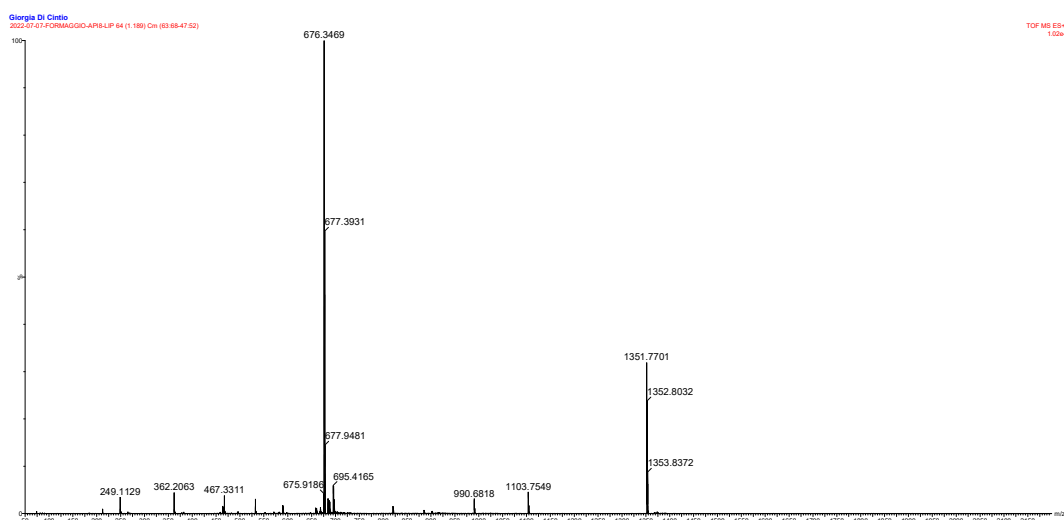

Fig. S6. ESI-HRMS Api8-SH.  $[MW+H]^+$ <sub>found</sub> = 1351.7701 m/z ;  $[MW+2H]^{++}$ <sub>found</sub> = 676.3469 m/z

## Leu4-NH2

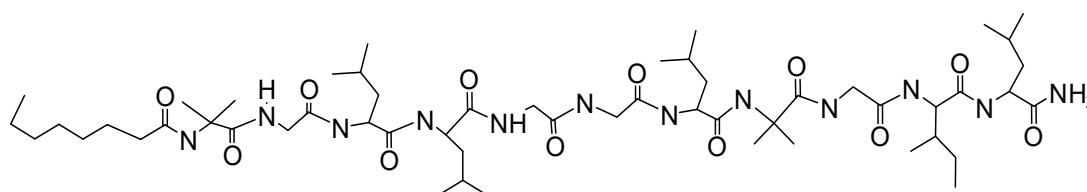

Chemical Formula:  $C_{54}H_{98}N_{12}O_{12}$

Exact Mass: 1106.74

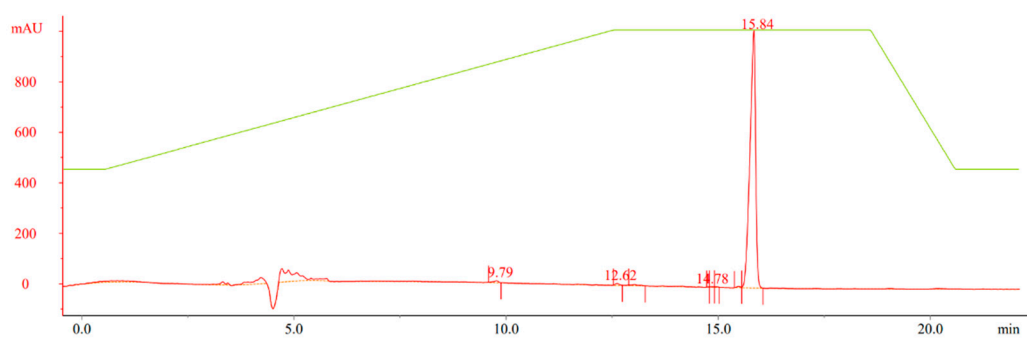

Fig. S7. HPLC Chromatogram Leu4-NH2. Phenomenex C18 50-100%B in 13 min, flux 1 ml/min, wavelength 216nm. Purity 98%.

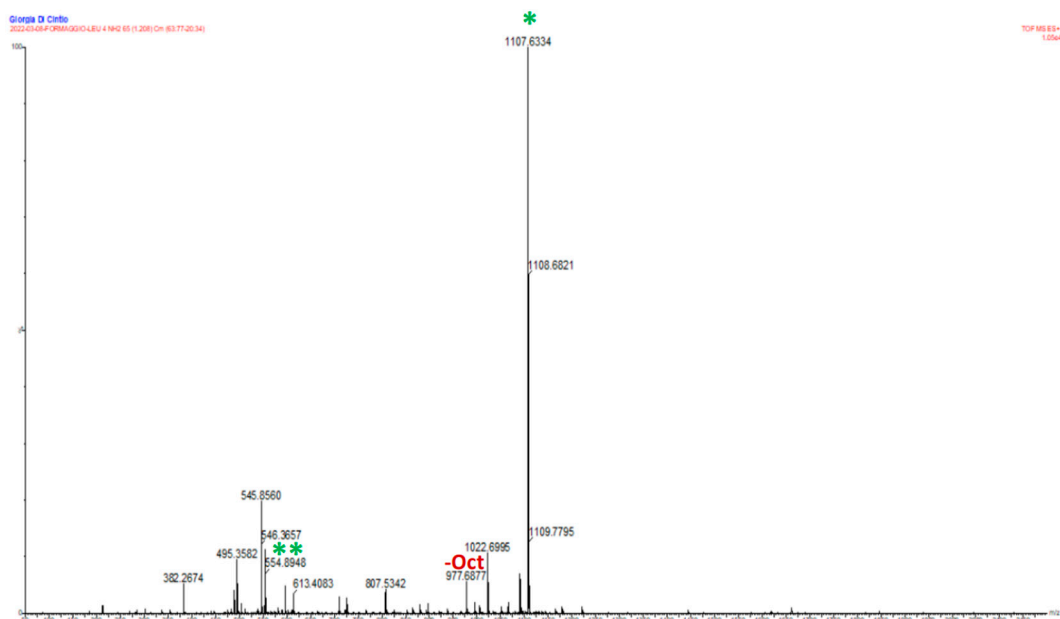

Fig. S8. ESI-HRMS Leu4-NH<sub>2</sub>. [MW+H]<sup>+</sup><sub>found</sub> = 1107.6334 m/z; [MW+2H]<sup>++</sup><sub>found</sub> = 554.8948 m/z; [MW-Oct+H]<sup>+</sup><sub>found</sub> = 977.6877 m/z.

## Leu4-FITC

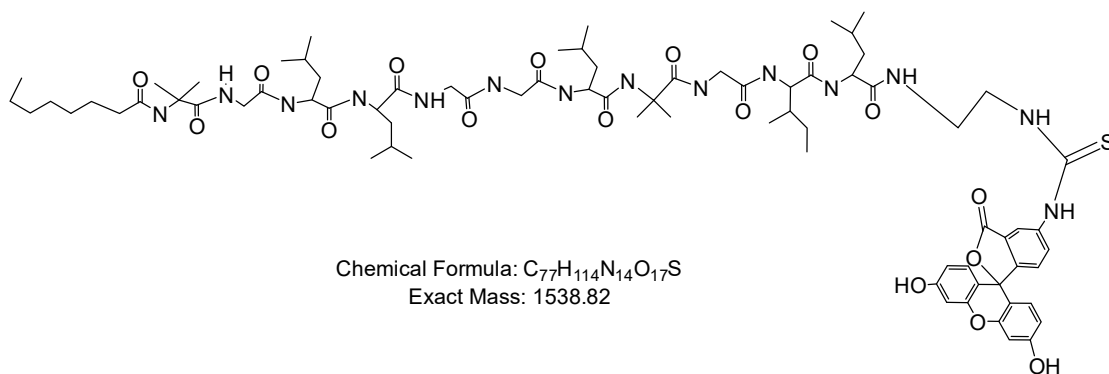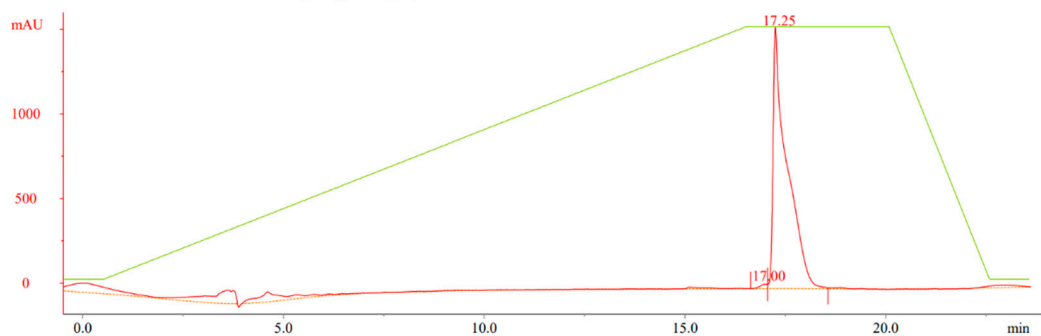

Fig S9. HPLC Chromatogram Leu4-FITC. Phenomenex C18 10-100%B in 15 min, flux 1 ml/min, wavelength 216nm. Purity 98%.

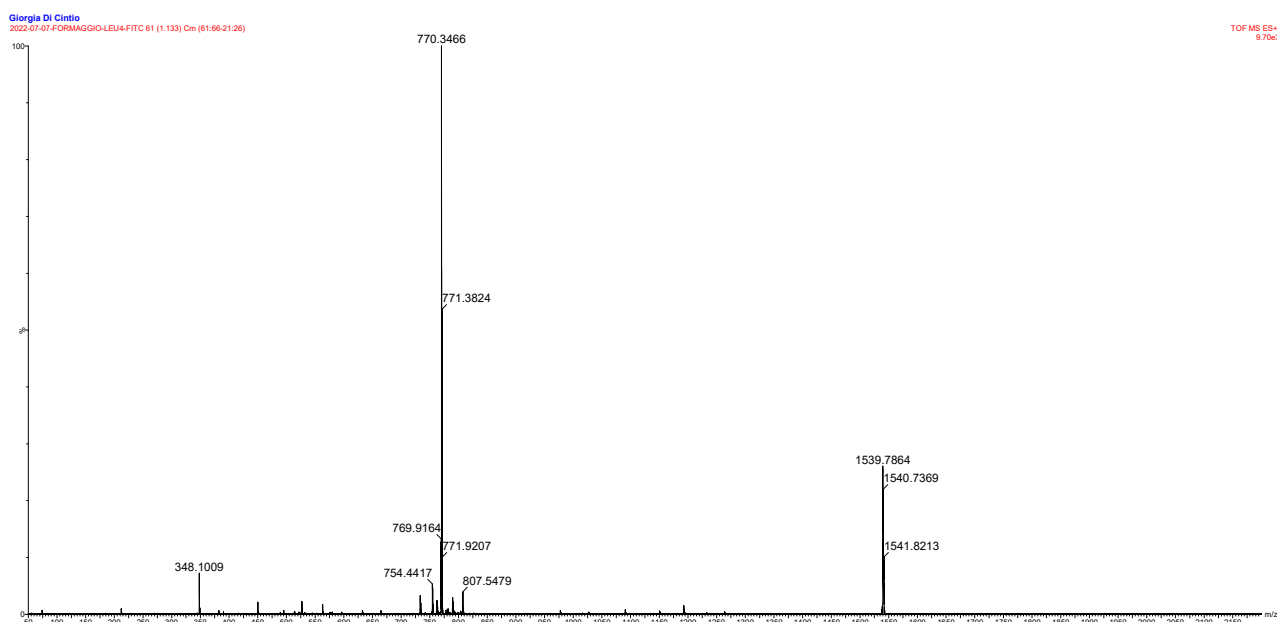

Fig. S10. ESI-HRMS Leu4-FITC.  $[\text{MW H}]^+_{\text{found}} = 1539.7864 \text{ m/z}$ ;  $[\text{MW}+2\text{H}]^{++}_{\text{found}} = 770.3466 \text{ m/z}$

## Leu4-SH

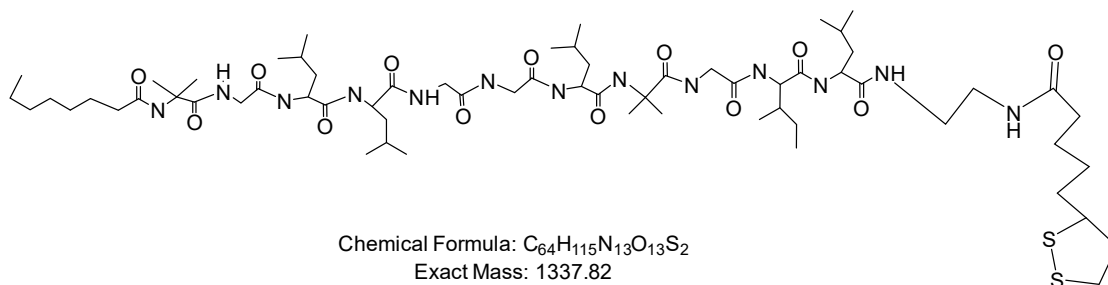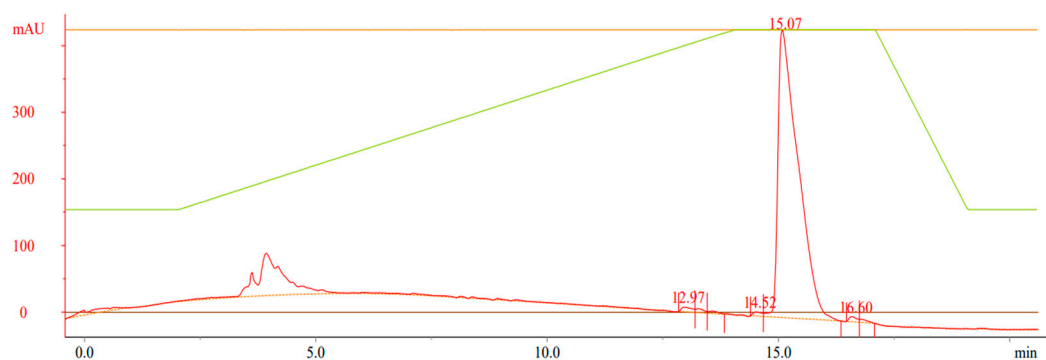

Fig. S11. HPLC chromatogram Leu4-SH. Phenomenex C4 40-100%B in 10 min, flux 1 ml/min, wavelength 216 nm. Purity 96%.

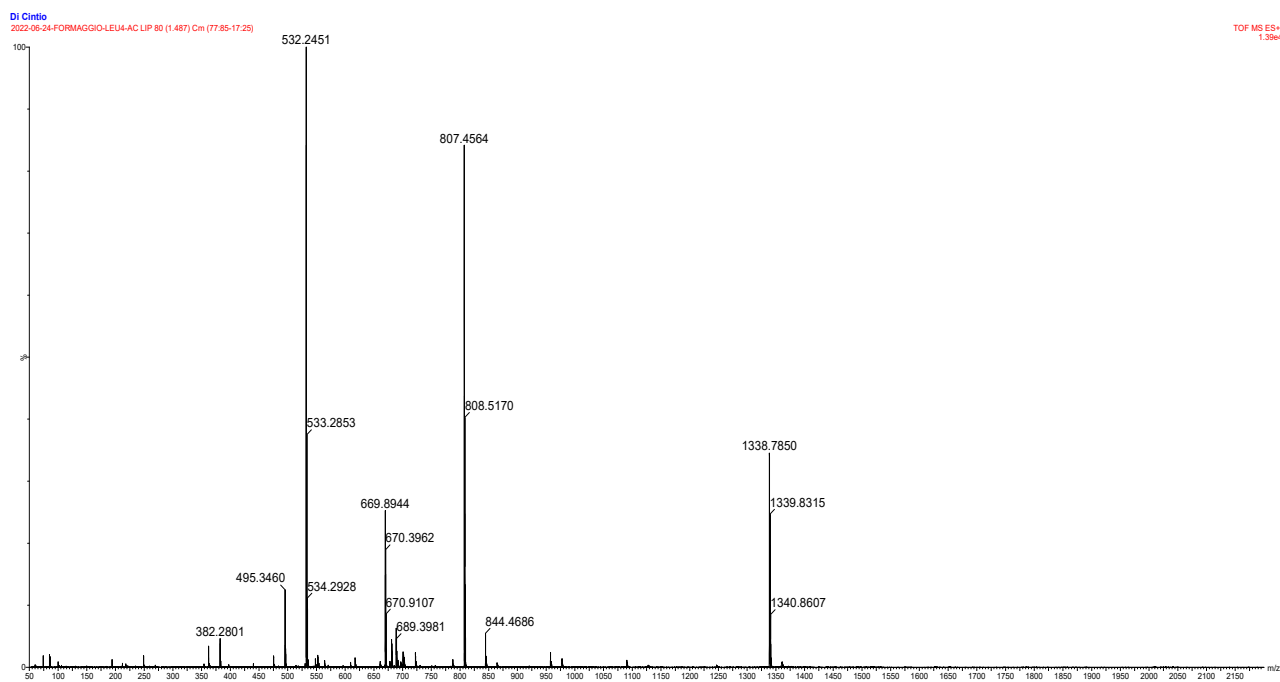

Fig. S12. ESI-HRMS Leu4-SH.  $[MW+H]^+_{\text{found}} = 1338.7850 \text{ m/z}$ ;  $[MW+2H]^{++}_{\text{found}} = 669.8944 \text{ m/z}$ ; mass fragmentation:  $532.25+807.46 = 1339.71$



## 2. GNP characterizations

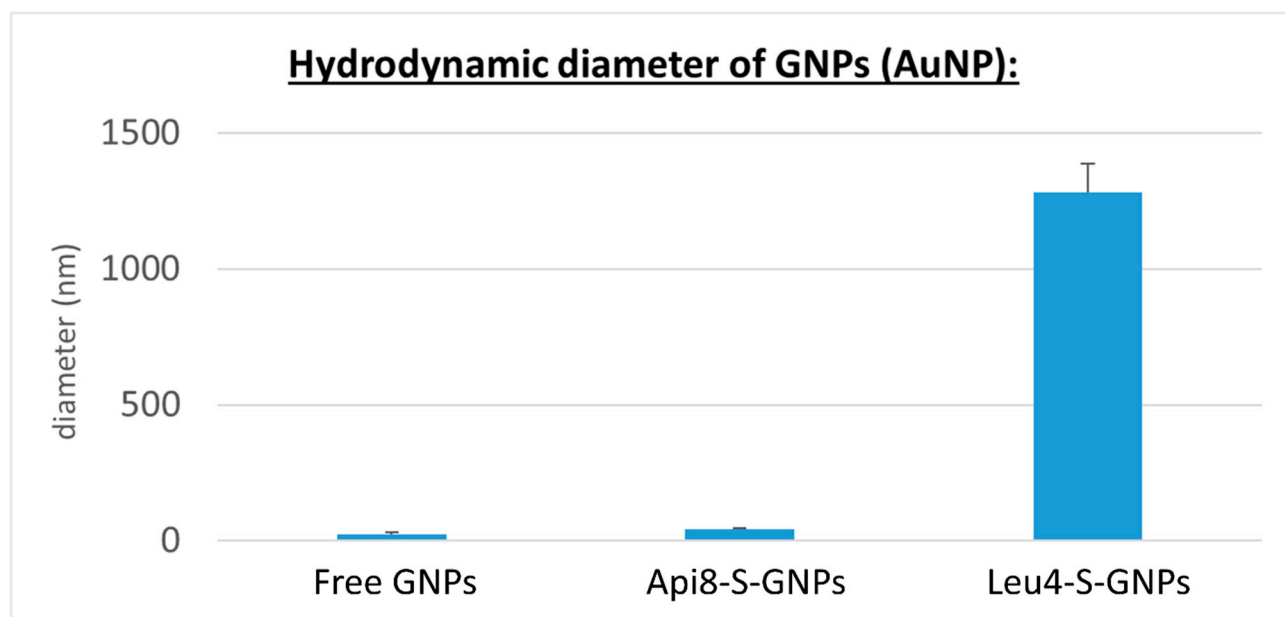

Figure S13. Average diameter of the GNPs obtained by dynamic light scattering.

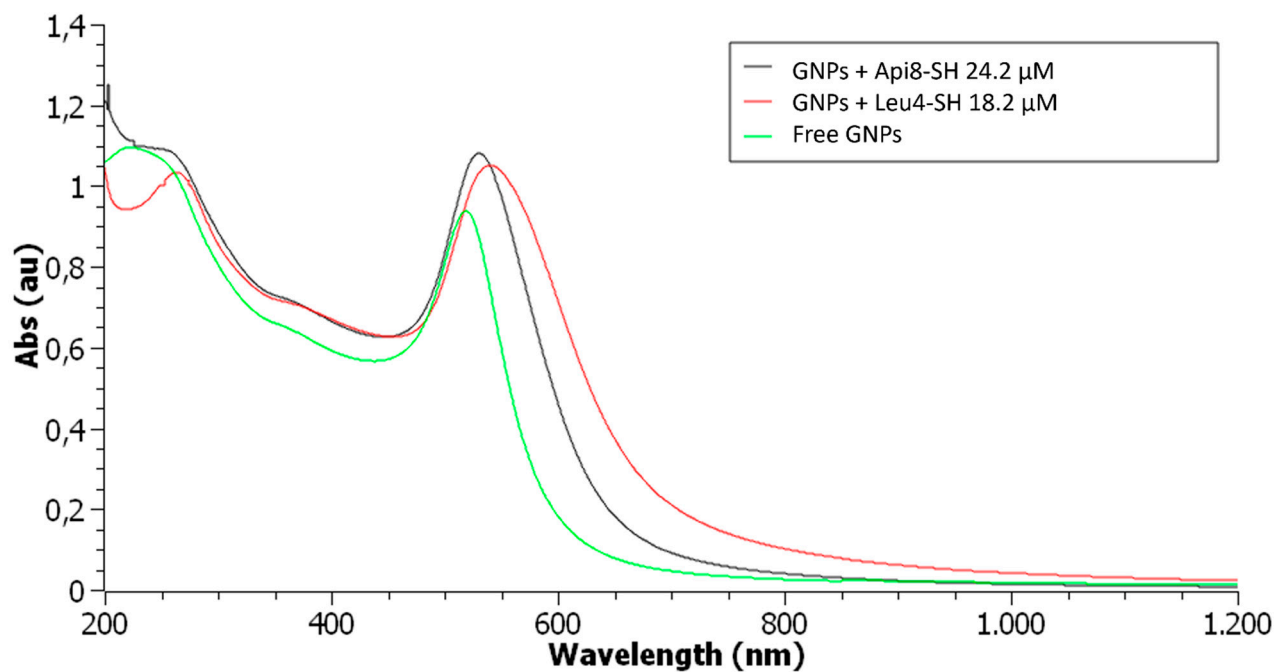

Figure S14. Absorption spectra of GNPs before (green curve) and after five-hour incubation in the presence of Leu4-SH 18.2  $\mu$ M (red curve) or Api8-SH 24.2  $\mu$ M (black curve).

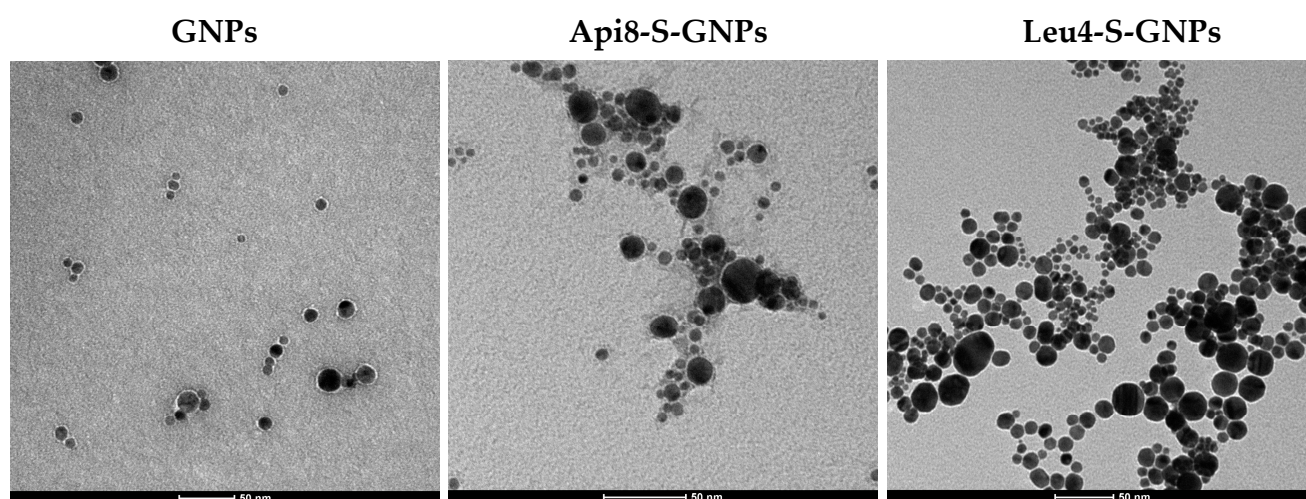

Figure S15. TEM images of GNPs suspensions before (left column) and after incubation with Api8-SH (central column) or Leu4-SH (right column).

### 3. CD spectra of the new peptide sequences

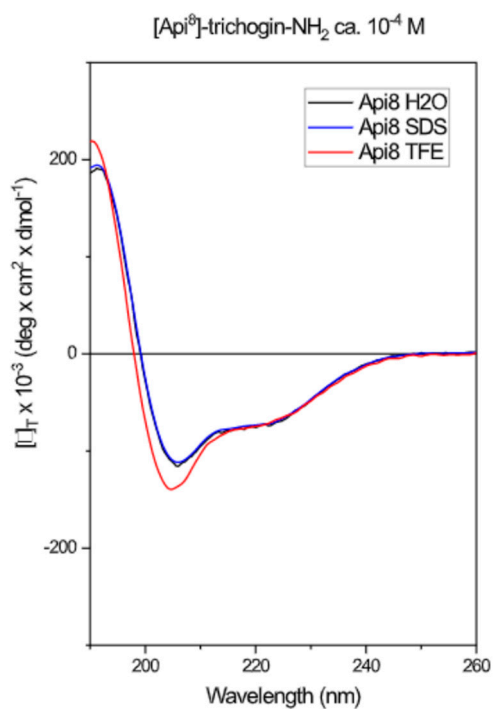

Figure S16. CD Spectra of Aπi8-NH<sub>2</sub> in sodium dodecyl sulfate (SDS) 100mM (blue), H<sub>2</sub>O (black) and 2,2,2-trifluoroethanol (TFE) (red). Peptide concentration 0.1mM.

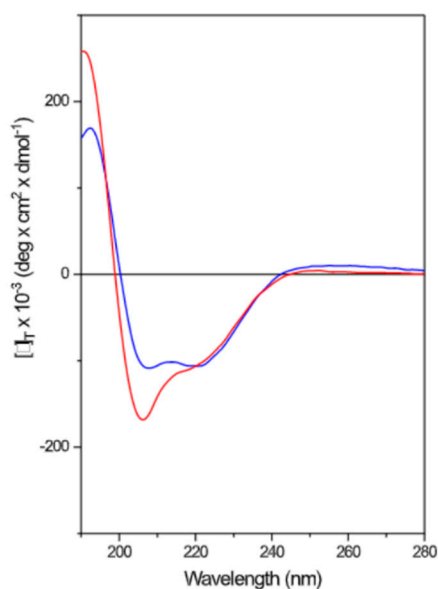

Figure S17. CD Spectra of Aπi8-FITC in SDS 100mM (blue) and TFE (red). Peptide concentration 0.1mM.

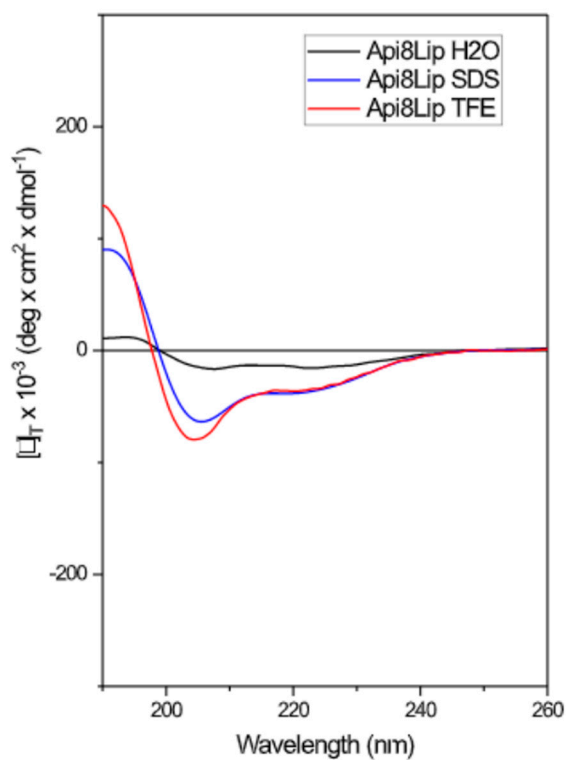

Figure S18. CD Spectra of Api8-SH in SDS 100mM (blue), H<sub>2</sub>O (black) and TFE (red). Peptide concentration 0.1mM.

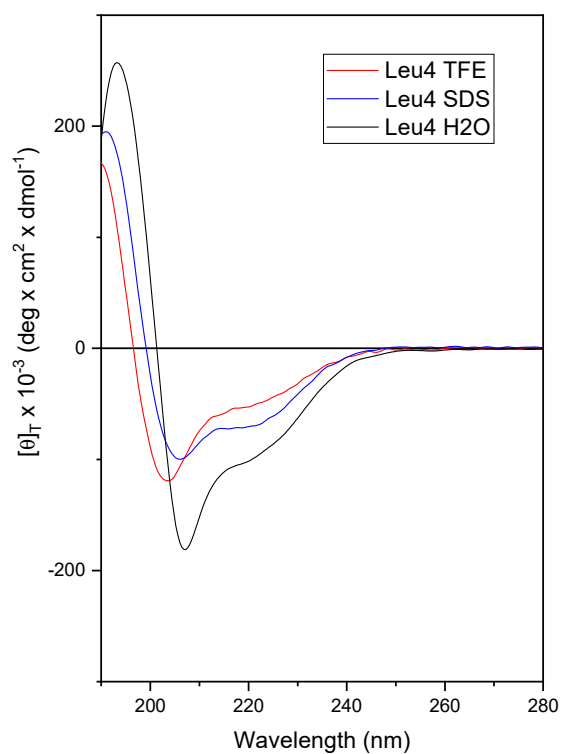

Figure S19. CD Spectra of Leu4-NH<sub>2</sub> in SDS 100mM (blue), H<sub>2</sub>O:CH<sub>3</sub>OH 9:1 (black) and TFE (red). Peptide concentration 0.1mM. Methanol was added to improve solubility

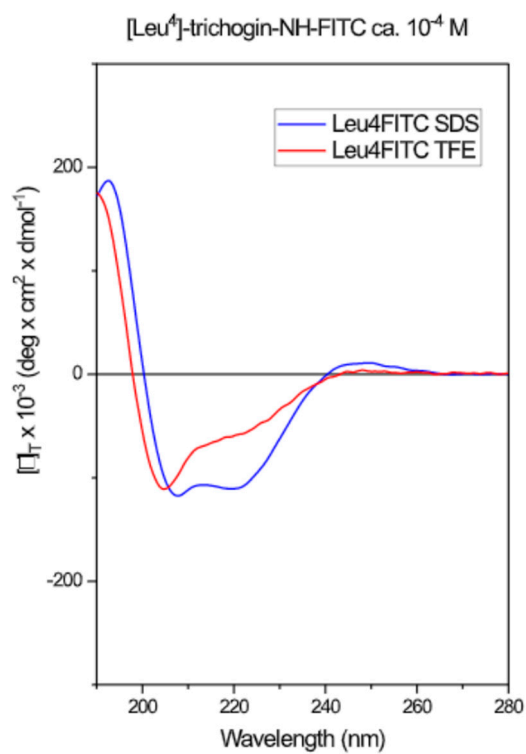

Figure S20. CD Spectra of Leu4-FITC in SDS 100mM (blue) and TFE (red). Peptide concentration 0.1mM.

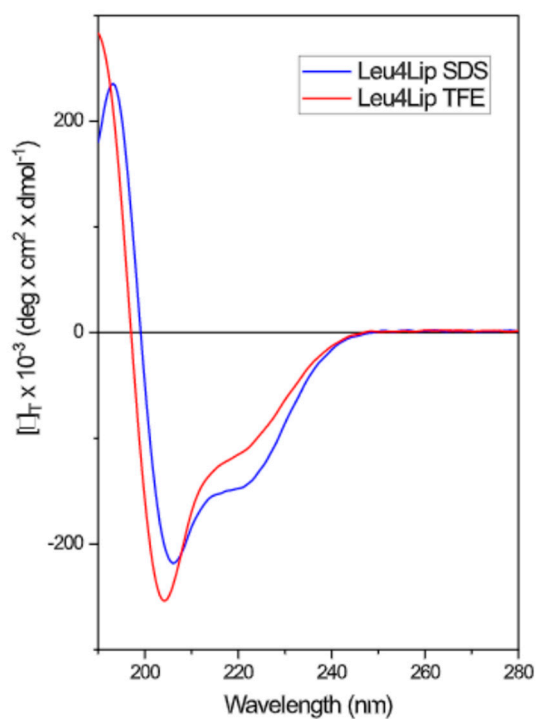

Figure S21. CD Spectra of Leu4-SH in SDS 100mM (blue) and TFE (red). Peptide concentration 0.1mM.

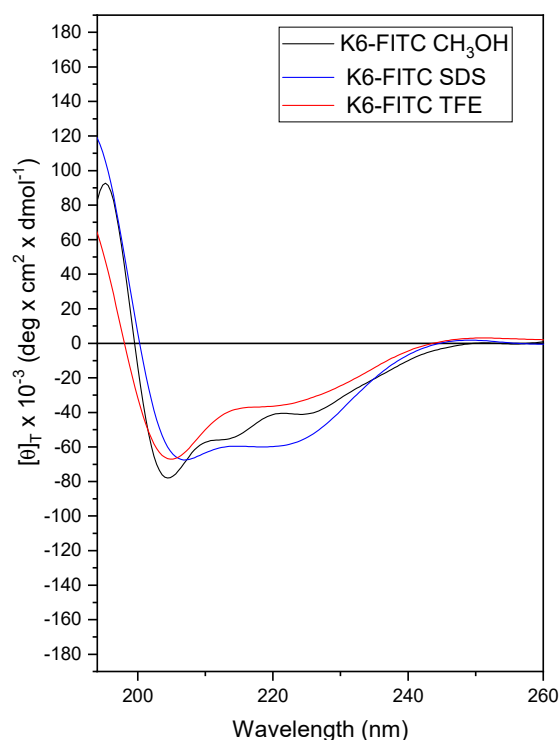

Figure S22. CD Spectra of K6-FITC in SDS 100mM (blue) and TFE (red). Peptide concentration 0.1mM.

#### 4. *In vitro* analysis

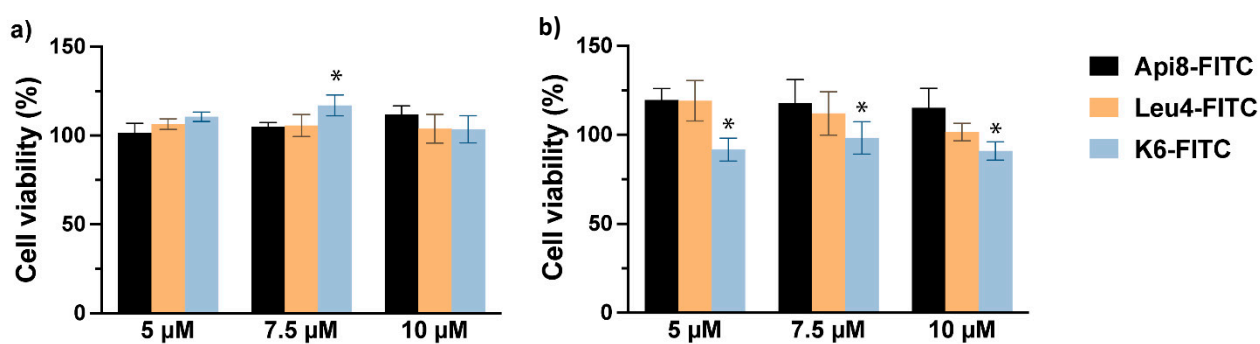

Figure S23. Cytotoxicity of FITC-conjugated peptaibols toward triple negative breast cancer cells MDA-MB-231 (a) and normal breast cells MCF-10A (b). Cells were exposed to increasing concentrations of peptaibols for 24 h and viability was measured with the MTS assay at the end of the incubation time. Data are expressed as mean percentage  $\pm$  SD of at least two independent experiments, carried out in triplicate. \*:  $p < 0.001$ , significantly different from controls (t-test).

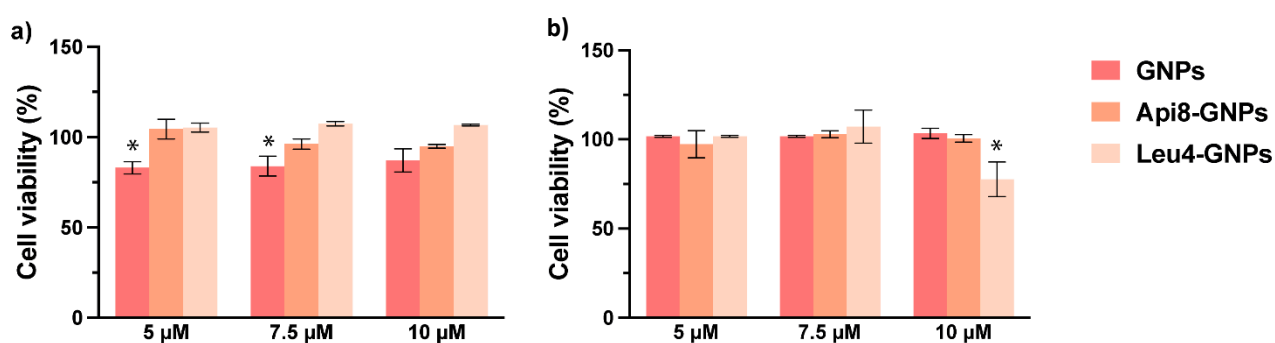

Figure S24. Cytotoxicity of GNP formulations toward triple negative breast cancer cells MDA-MB-231 (a) and normal breast cells MCF-10A (b). Cells were exposed to increasing concentrations of GNPs for 24 h and viability was measured with the MTS assay at the end of the incubation time. Data are expressed as mean percentage  $\pm$  SD of at least two independent experiments, carried out in triplicate. \*:  $p < 0.001$ , significantly different from controls (t-test).

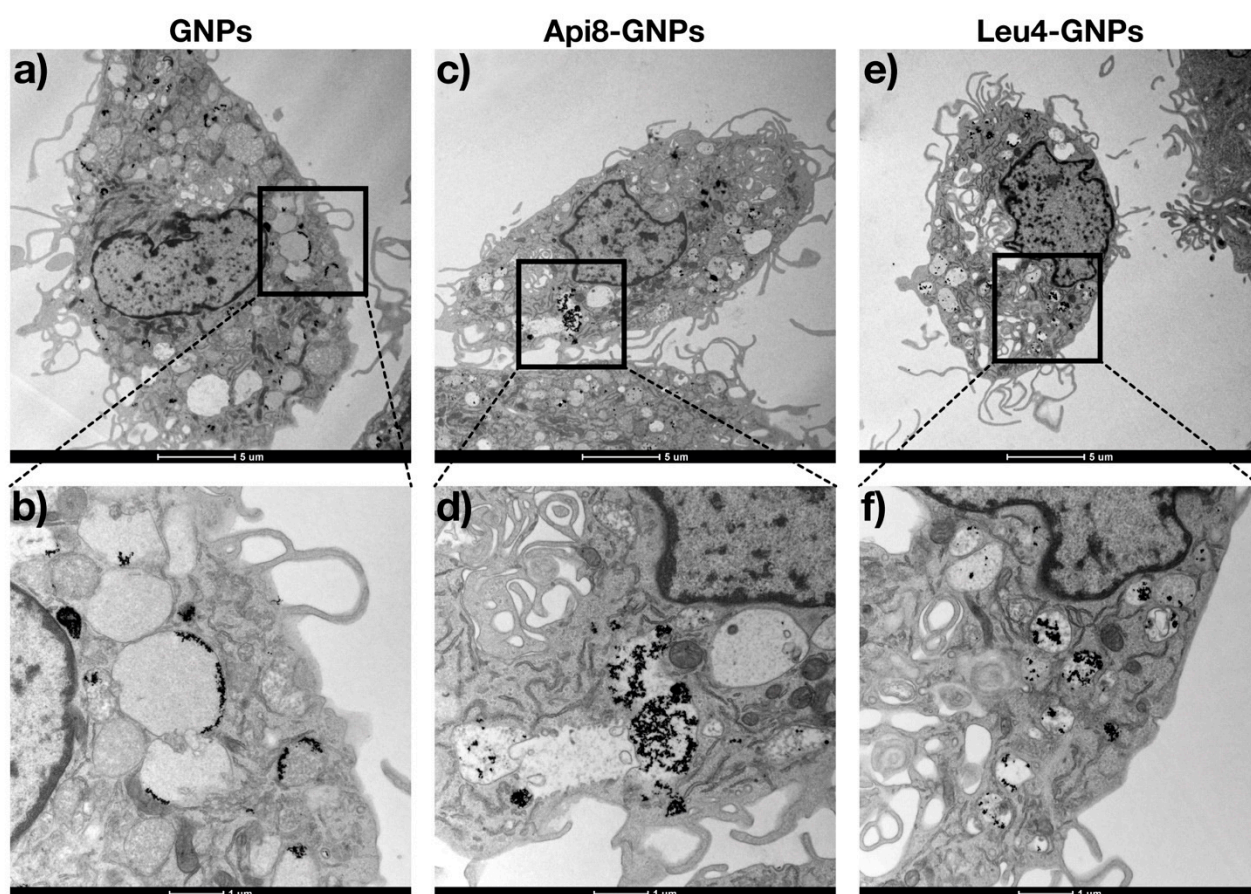

Figure S25. Representative TEM images of the interaction of different GNP formulations with human macrophages, derived from monocytes isolated from buffy coats. Scale bars: 5  $\mu$ m (a,c,e); 1  $\mu$ m (b,d,f).
